# Supplementary material
Source: MDPI journal article supplement (https://www.mdpi.com/2571-9408/6/7/284)
Supplement: s1 [file s1 › heritage-2427664-supplementary.pdf]

## Supplementary Materials

### *Classification of the Book of Uí Mhaine*

**Table S1.** Classification of the Book of Uí Mhaine by scribe, quire, and folios according to William O’Sullivan. Key to understanding the “line” column of the table. First is listed the folio number, followed by either recto or verso; recto being indicated by “r” and verso by “v”. What follows is the column in which the line of text is found, indicated by either “a”, meaning the first column of text, or “b”, indicating the second column of text. In cases where there are more than two columns on the folio, each column is listed as the succeeding letter, meaning column “c”, column “d”, etc. Finally, the last number indicates the line of text in said column. For example, f1ra1 means the first line of text in the first column of the recto of folio 1. O’Sullivan does not indicate at exactly which line on folio 112v scribe D6 turns over to scribe C, but does specify that scribe D6 returns again to finish the text from scribe C at line 10 of column “a” on folio 114r. This is indicated in the table with question marks (?). Scribe D6 concludes on column “a” of folio 114v, where the second column of text was left blank to be added to later by a secondary scribe.

| Scribe              | Quire | Folio(s) | Lines           |
|---------------------|-------|----------|-----------------|
| G2                  | 1     | f1       | f1ra1–f1va8     |
| G1                  |       | f1–f2    | f1va9–f2ra25    |
| C                   |       | f2–f6    | f2ra26–f6vb10   |
|                     | 2     | f7–f10   | f7ra1–f10va37   |
| G2                  | 3     | f11–f12  | f11ra1–f12vb70  |
| G1                  | 4     | f13–f18  | f13ra1–f18vd51  |
|                     | 5     | f19–f22  | f19ra1–f22vb20  |
| C                   |       | F22      | f22vb23–f22vb70 |
|                     | 6     | f23–f24  | f23ra1–f23vb53  |
| ?                   |       | F24      | f24r1–f24v9     |
| G2                  | 7     | f25–f27  | f25ra1–f27rb65  |
| G1                  |       | f27–f32  | f27va1–f32v71   |
|                     | 8     | f33–f38  | f33ra1–f38ra23  |
| C                   |       | F38      | f38ra24–f38vb49 |
|                     | 9     | f39–f47  | f39ra1–f47vb63  |
| F                   | 10    | f48–f55  | f48ra1–f55vb61  |
| C                   | 11    | F56      | f56ra1–f56vb49  |
|                     | 12    | f57–f64  | f57ra1–f64vb69  |
|                     | 13    | f65–f69  | f65ra1–f69va6   |
| Secondary Scribe(s) |       | F69      | f69va8–f69vb19  |
| C                   | 14    | f70–f74  | f70ra1–f74ra27  |

|                     |    |           |                   |
|---------------------|----|-----------|-------------------|
| Secondary Scribe(s) |    | f74–f75   | f74ra28–f75rb60   |
| G1                  | 15 | f76–f79   | f76ra1–f79va60    |
| C                   |    | f79–f83   | f79va61–f83vb59   |
| D1                  | 16 | f84       | f84ra1–f84rb2     |
| G1                  |    | F84m–f90  | f84rb3–f90rb20    |
| D2                  |    | f90–f91   | f90rb21–f91vb66   |
| D3                  | 17 | F92       | f92ra1–f92rb62    |
| C                   |    | f92–f99   | f92va1–f99rb51    |
| C                   |    | F99       | f99va1–f99vb47    |
| D1                  | 18 | f100–f101 | f100ra1–f101va66  |
| D4                  |    | F101      | f101vb1–f101vb50  |
| D1                  |    | f101–f102 | f101vb51–f102va64 |
| G1                  |    | F102      | f102vb1–f102vb64  |
| D3                  |    | f103–f107 | f103ra1–f107vb57  |
| C                   | 19 | f108–f110 | f108ra1–f110vb55  |
| D3                  |    | F110      | f110vb56–f110vb59 |
| D5                  |    | F111      | f111ra1–f111va44  |
| C                   |    | f111–f112 | f111vb1–f112ra45  |
| D6                  |    | F112      | f112ra46–f112rb20 |
| C                   |    | f112–?    | f112rb21–?        |
| D6                  |    | ? –f114   | ?–f114ra49        |
| D6                  |    | F114      | f114ra50–f114va43 |
| Secondary Scribe(s) |    | F114      | F114vb            |
| C                   | 20 | f115–f122 | f115ra1–122vb62   |
|                     | 21 | f123–f130 | f123ra1–f130vb47  |
|                     | 22 | f131–f139 | f131ra1–f139vb58  |
|                     | 23 | f140–f143 | f140ra1–f143vb41  |
|                     | 24 | f144–f151 | f144ra1–f151vb66  |
|                     | 25 | f152–f157 | f152ra1–f157vb65  |

*High-res photographs of stain patterns and ink transfer*

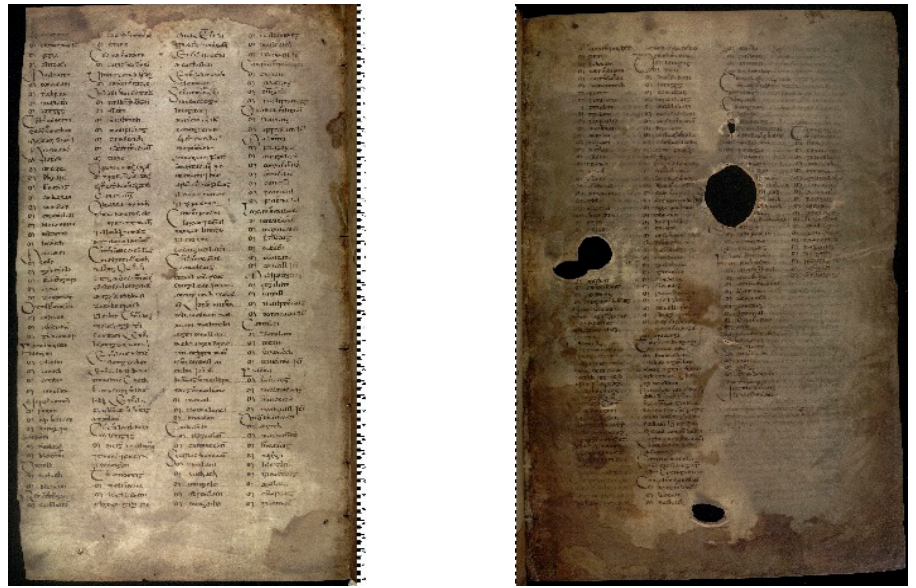

**Figure S1.** High-res photographs of folio 18v (left) and folio 19r (right), corresponding to the transition from quire 4 to 5, showing dis-homogeneity in stain pattern. This break is probably the result of the loss of a single folio at this point.

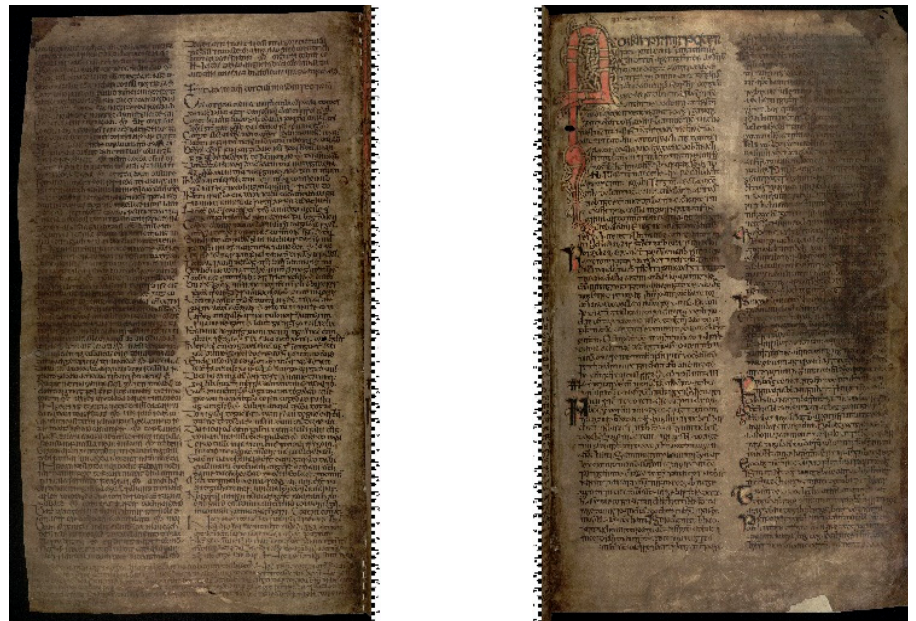

**Figure S2.** High-res photographs of folio 47v (left) and folio 48r (right), marking the transition from quire 9 to 10. This might be an indication that these two quires were housed together in a very similar environment even before they were bound together.

*Ink transfer from f. 2v to f. 3r*

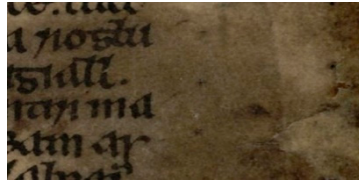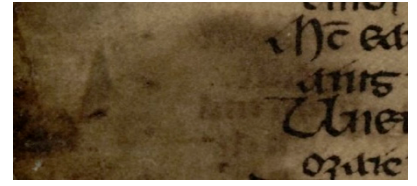

**Figure S3.** Example of ink transfer induced by humidity from folio 2v (left) and folio 3r (right).

*Ink transfer from f. 3v to f. 4r*

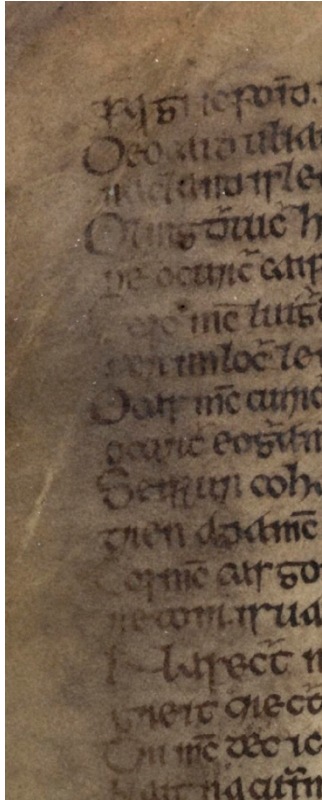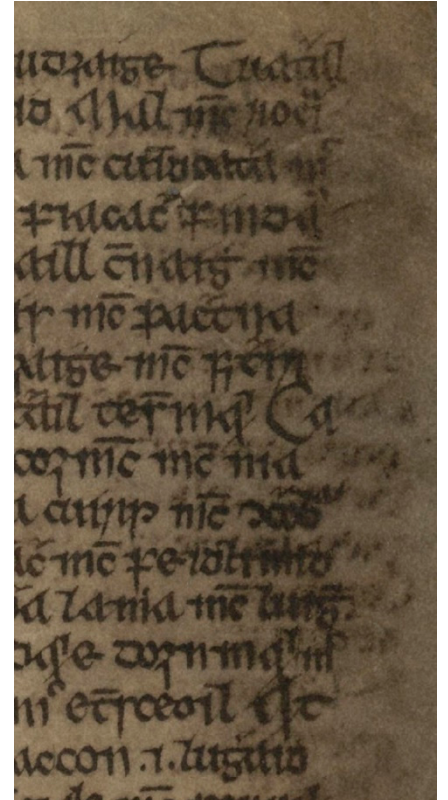

**Figure S4.** Example of ink transfer induced by water-damage. Folio 3v (left) and folio 4r (right).

*Example of graphic ruling. Folio 20v.*

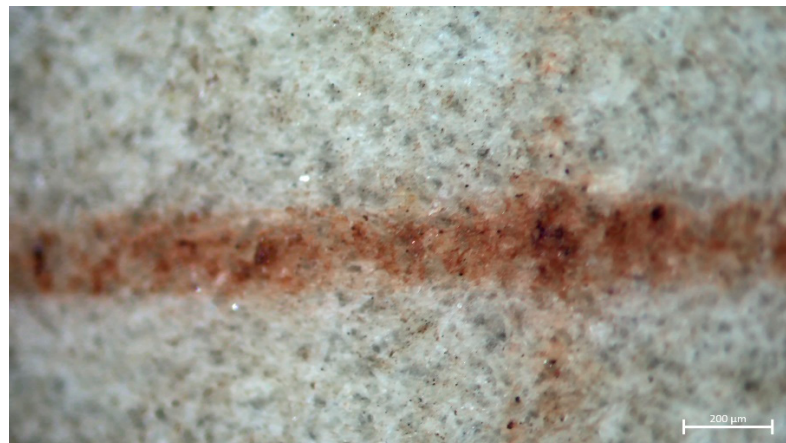

**Figure S5.** Microscopic image of graphic ruling in folio 20v.
